# Supplementary material
Source: publisher figshare collection journal article supplement (https://acs.figshare.com/ndownloader/files/26691432)
Supplement: Supplementary file 1 [file 26691432]

## Supporting Information for

### Acidity and Local Confinement Effect in Mordenite Probed by Solid-State NMR Spectroscopy

Ke Gong<sup>1,2,#</sup>, Zhengmao Liu<sup>1,2,#</sup>, Lixin Liang<sup>1,2</sup>, Zhenchao Zhao<sup>1</sup>, Meiling Guo<sup>3</sup>,  
Xuebin Liu<sup>3</sup>, Xiuwen Han<sup>1</sup>, Xinhe Bao<sup>1</sup>, Guangjin Hou<sup>1,\*</sup>

*<sup>1</sup>State Key Laboratory of Catalysis, National Laboratory for Clean Energy, 2011-Collaborative Innovation Center of Chemistry for Energy Materials, Dalian Institute of Chemical Physics, Chinese Academy of Sciences, Zhongshan Road 457, Dalian 116023, China.*

*<sup>2</sup>University of Chinese Academy of Sciences, Beijing 100049, China.*

*<sup>3</sup>Energy Innovation Laboratory, BP (China) Dalian Office, Dalian, 116023, China.*

\*Corresponding author: [ghou@dicp.ac.cn](mailto:ghou@dicp.ac.cn) (G. Hou)

# These authors contributed equally.

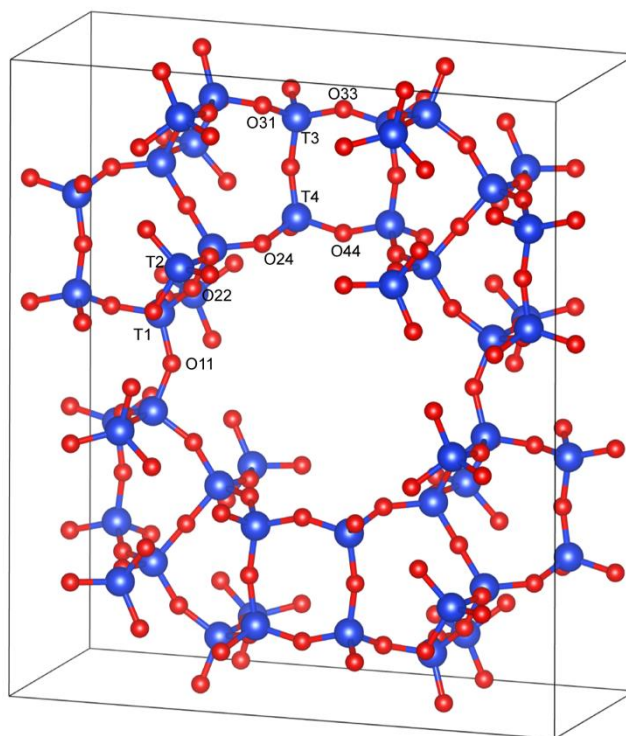

**Figure S1.** T sites and oxygen sites in MOR zeolites.

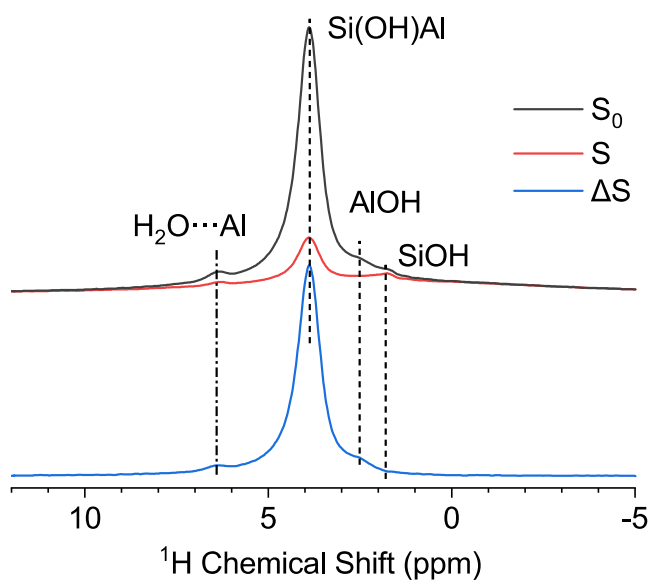

**Figure S2.**  $^1\text{H} \{^{27}\text{Al}\}$  S-RESPDOR of dehydrated H-MOR, S,  $S_0$  stand for the spectra with and without  $^{27}\text{Al}$  irradiation,  $\Delta S$  stands for the difference spectrum, the recoupling time is 0.9 ms.

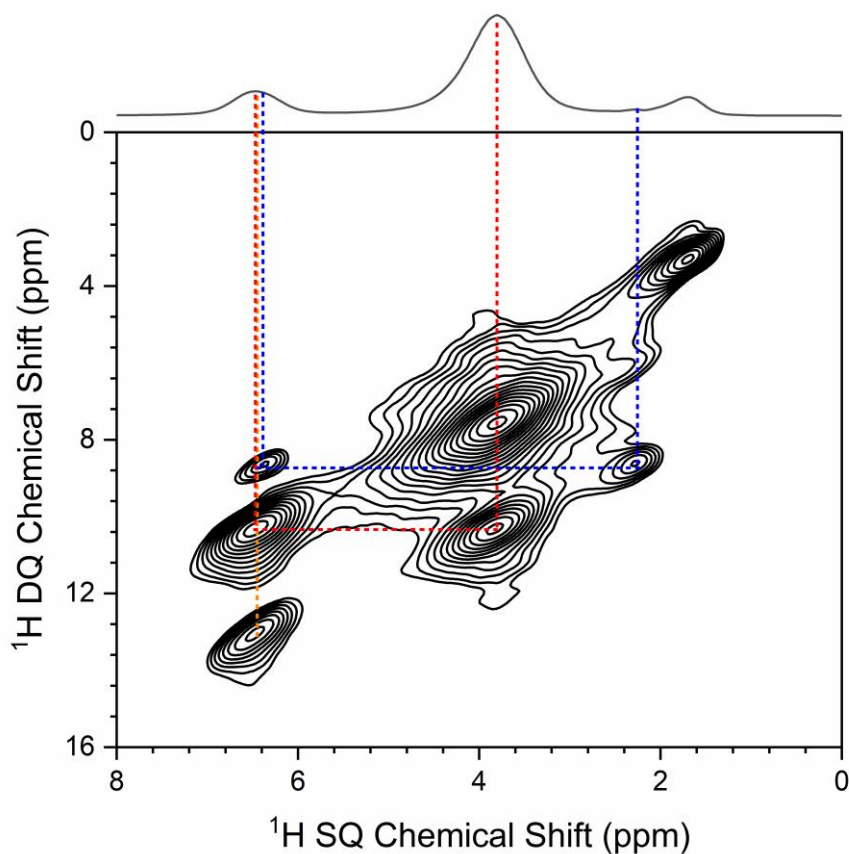

**Figure S3.**  $^1\text{H}$  POST-C7 DQ-SQ NMR spectrum of dehydrated H-MOR. Orange, red and blue dash lines indicate the space proximity of  $^1\text{H}$  atom of adsorbed water with itself, with BASs and with  $\text{AlOH}$ , respectively.

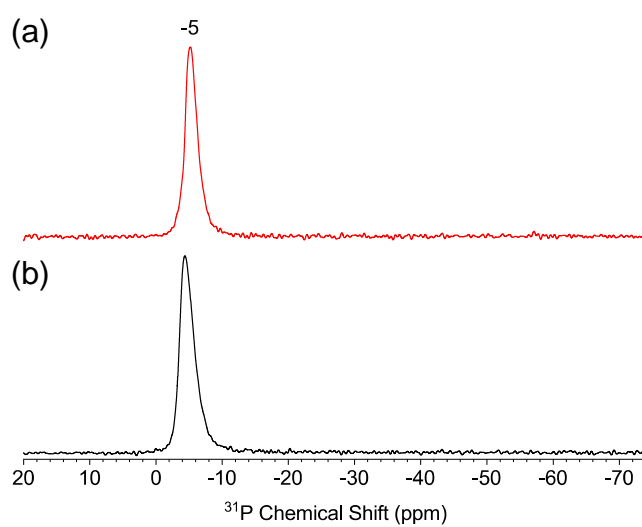

**Figure S4.**  $^{31}\text{P}$  SP MAS NMR spectra of H-MOR adsorbed with TMP before (a) and after (b)  $\text{CD}_3\text{CN}$  adsorption, with  $^1\text{H}$  decoupled.

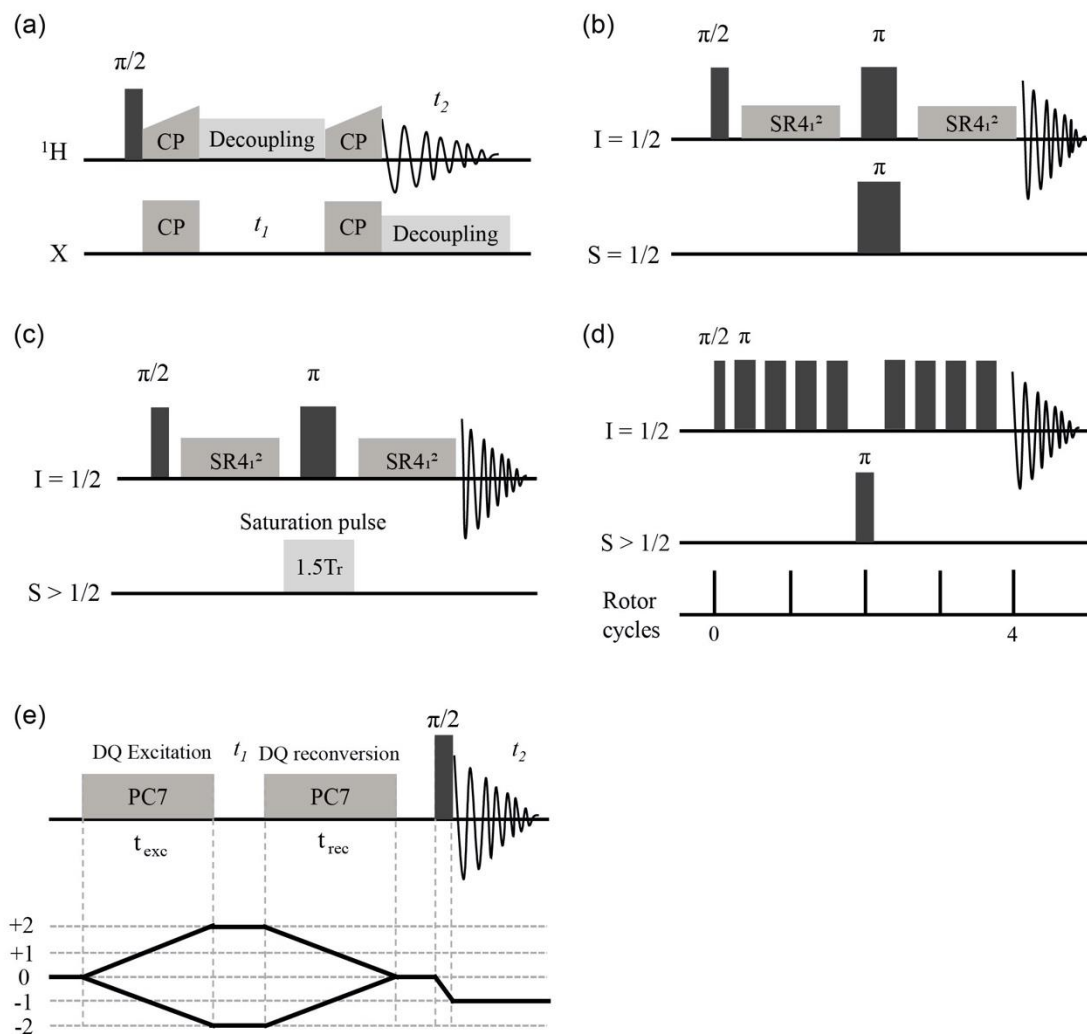

**Figure S5.** Pulse sequences of NMR experiments used in this article: (a) the proton detected  $\{^1\text{H}-\}\text{X}-^1\text{H}$  CP HETCOR experiments; (b) S-REDOR experiments; (c) S-RESPDOR experiments; (d) REAPDOR experiments; (e) POST C7 DQ-SQ correlation experiments.

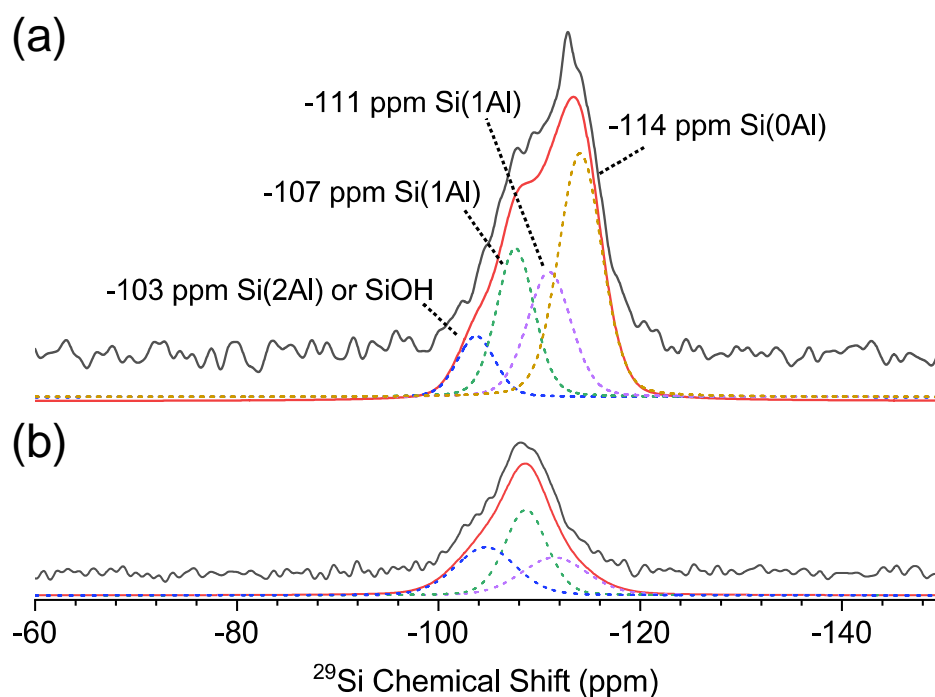

**Figure S6.**  $^{29}\text{Si}$  SP and CP NMR spectra of H-MOR after  $\text{CD}_3\text{CN}$  adsorption with deconvolution according the  $\{^1\text{H}-\}^{29}\text{Si}-^1\text{H}$  CP HETCOR spectrum shown in **Figure 3g**.

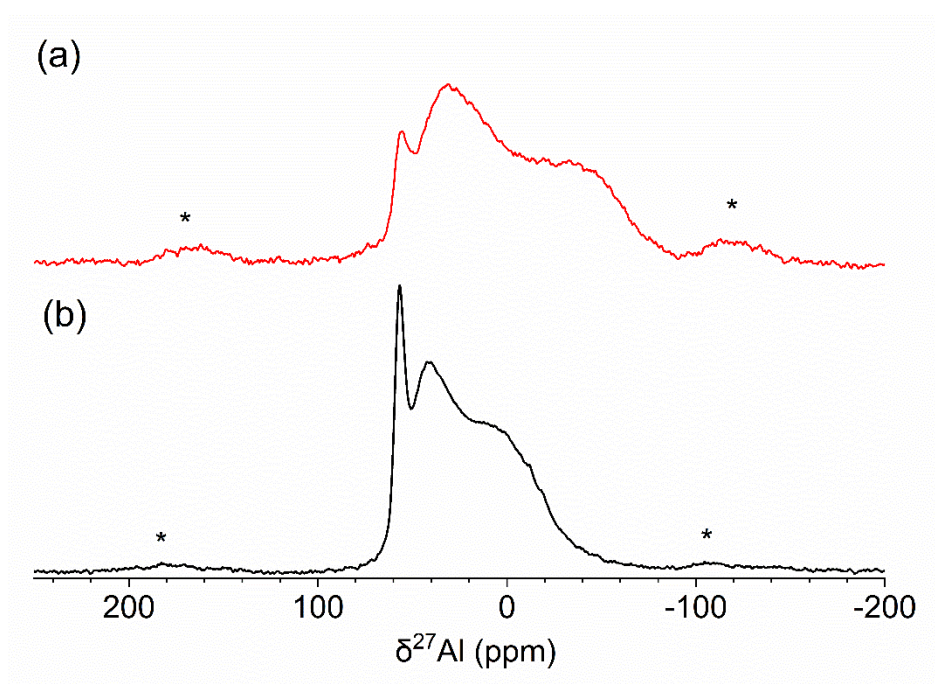

**Figure S7.**  $^{27}\text{Al}$  MAS NMR spectra of dehydrated H-MOR zeolites before (a) and after (b)  $\text{CD}_3\text{CN}$  adsorption.

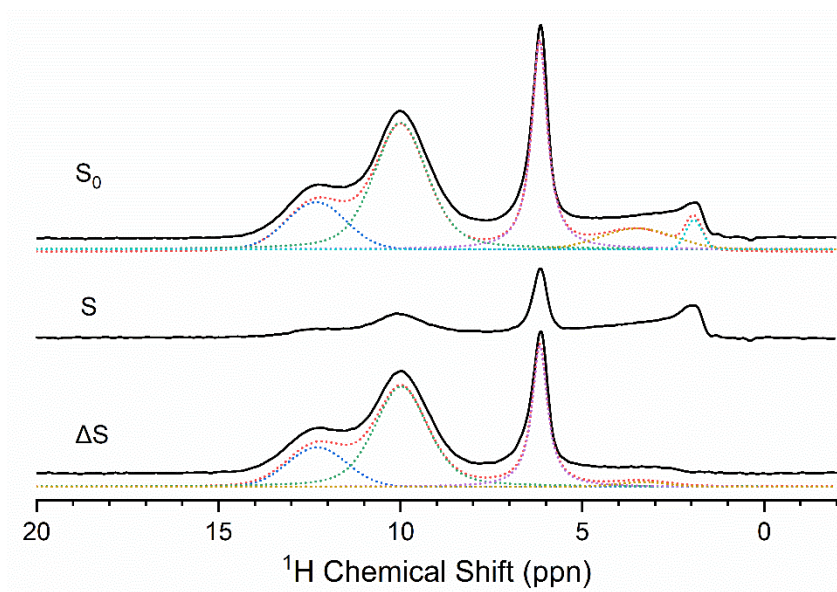

**Figure S8.**  $^1\text{H} \{^{27}\text{Al}\}$  S-RESPDOR of dehydrated H-MOR after  $\text{CD}_3\text{CN}$  adsorption with deconvolution, S,  $S_0$  stand for the spectra with and without  $^{27}\text{Al}$  irradiation,  $\Delta S$  stands for the difference spectrum, the recoupling time is 0.9 ms.

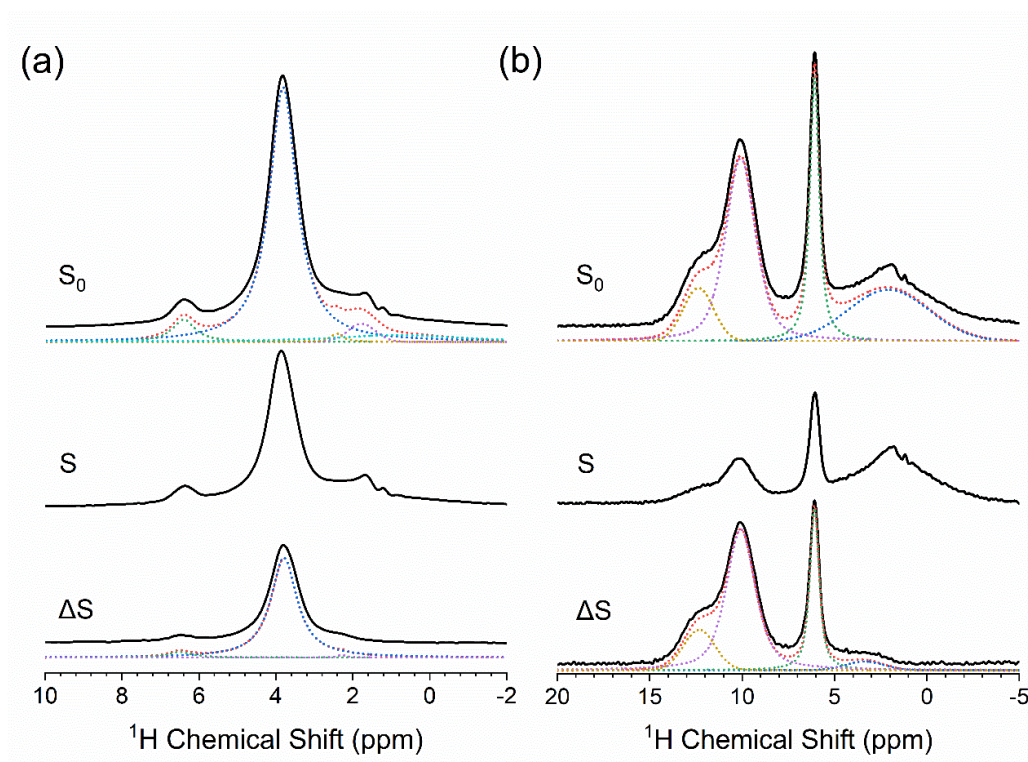

**Figure S9.**  $^1\text{H} \{^{27}\text{Al}\}$  REAPDOR of dehydrated H-MOR before (a) and after (b)  $\text{CD}_3\text{CN}$  adsorption with deconvolution. S,  $S_0$  stand for the spectra with and without  $^{27}\text{Al}$  irradiation,  $\Delta S$  stands for the difference spectrum, the recoupling time is 1.83 ms with 2 MHz (a) and 0.5 MHz (b) offset of  $^{27}\text{Al}$ .

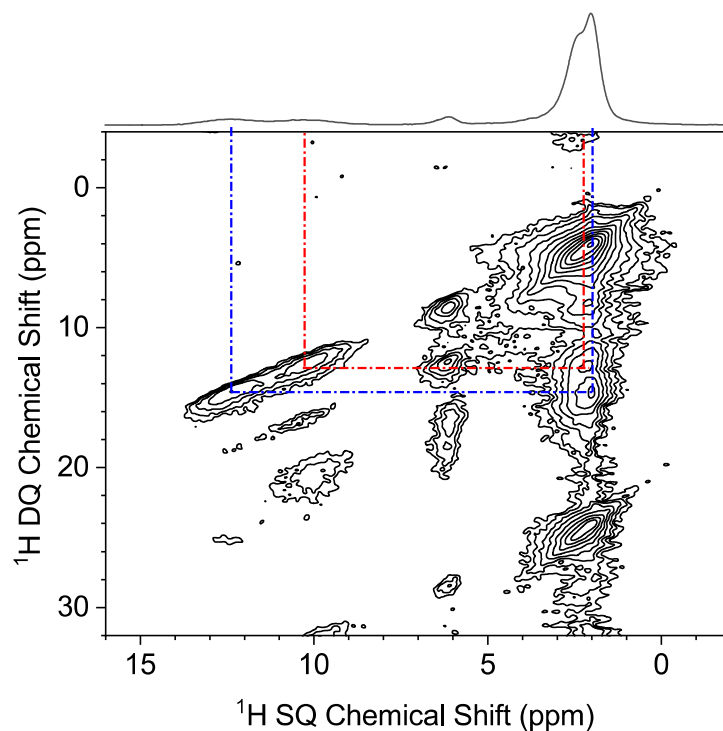

**Figure S10.**  $^1\text{H}$  POST-C7 DQ-SQ NMR spectrum of H-MOR after  $^{15}\text{N}$ - $\text{CH}_3\text{CN}$  adsorption.

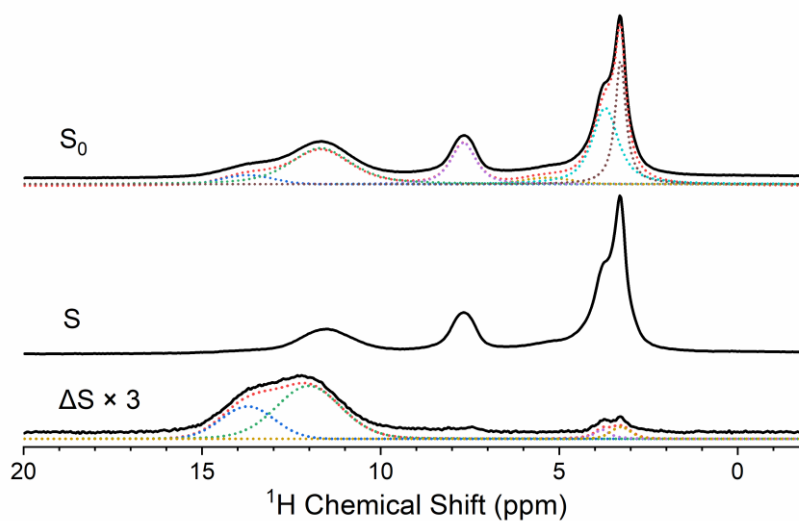

**Figure S11.**  $^1\text{H}$   $\{^{15}\text{N}\}$  S-REDOR of dehydrated H-MOR after  $\text{CD}_3\text{CN}$  adsorption at 293 K with deconvolution. S,  $S_0$  stand for the spectra with and without  $^{27}\text{Al}$  irradiation,  $\Delta S$  stands for the difference spectrum, the recoupling time is 1 ms.



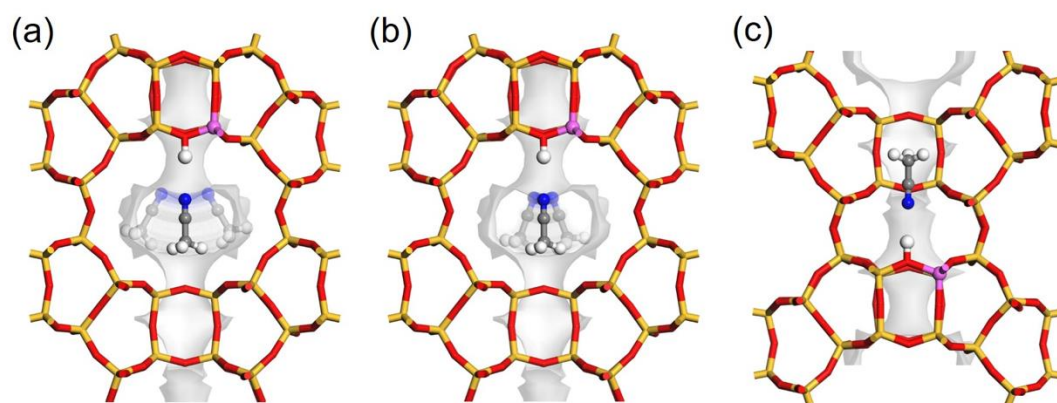

**Figure S12.** Schematic of (a) highly flexible acetonitrile in 12MR channels, (b) partially restricted acetonitrile in 12MR channels and (c) restricted acetonitrile in 8MR channels.



**Table S1.** Acquisition parameters for CP NMR experiments.

| <b>Experiment</b>                                                  | <b><sup>29</sup>Si CP</b>    | <b><sup>15</sup>N CP</b>     | <b><sup>1</sup>H-<sup>15</sup>N-<sup>1</sup>H CP<sup>a</sup></b> |
|--------------------------------------------------------------------|------------------------------|------------------------------|------------------------------------------------------------------|
| B <sub>0</sub> (T)                                                 | 9.4                          | 14.1                         | 14.1                                                             |
| Number of scans                                                    | 1024                         | 2000                         | 64                                                               |
| Recycle delay (s)                                                  | 2                            | 2                            | 2                                                                |
| ω <sub>R</sub> (kHz)                                               | 12                           | 12                           | 12                                                               |
| <sup>1</sup> H RF field for 90°<br>pulse (kHz)                     | 81                           | 48                           | 48                                                               |
| Contact time (ms)                                                  | 3.5                          | 5                            | 5                                                                |
| <sup>1</sup> H RF amplitude ramp<br>for contact pulse              | ramp90.110.1000 <sup>b</sup> | ramp90.110.1000 <sup>b</sup> | amp90.110.1000 <sup>b</sup>                                      |
| <sup>1</sup> H RF field during<br>contact pulse (kHz)              | 71                           | 44                           | 44                                                               |
| X RF field during<br>contact pulse (kHz)                           | 52                           | 32                           | 32                                                               |
| <sup>1</sup> H RF field for<br>SPINAL64 decoupling<br>pulses (kHz) | 81                           | 48                           | 48                                                               |

<sup>a</sup> Same CP acquisition parameters are used for the first <sup>1</sup>H-<sup>15</sup>N CP and second <sup>15</sup>N-<sup>1</sup>H CP.

<sup>b</sup> <sup>1</sup>H contact RF field is swept from 90 to 110% of the set <sup>1</sup>H RF field linearly with 1000 steps during contact pulse.

**Table S2.** Acquisition parameters for 2D and double-resonance NMR experiments.

| Pulse sequence                                       | CP-HETCOR <sup>a</sup>                            |                                                  | REAPDOR                            | S-RESPDOR                          | DQ-SQ          | S-REDOR                           |
|------------------------------------------------------|---------------------------------------------------|--------------------------------------------------|------------------------------------|------------------------------------|----------------|-----------------------------------|
| Nuclei                                               | <sup>1</sup> H}- <sup>29</sup> Si- <sup>1</sup> H | <sup>1</sup> H}- <sup>15</sup> N- <sup>1</sup> H | <sup>1</sup> H { <sup>27</sup> Al} | <sup>1</sup> H { <sup>27</sup> Al} | <sup>1</sup> H | <sup>1</sup> H { <sup>15</sup> N} |
| B <sub>0</sub> (T)                                   | 9.4                                               | 14.1                                             | 9.4                                | 14.1                               | 14.1           | 14.1                              |
| Number of scans                                      | 400 - 800                                         | 400                                              | 32                                 | - <sup>c</sup>                     | 32             | - <sup>c</sup>                    |
| <i>t</i> <i>l</i> increments (us)                    | 125                                               | 3000                                             | -                                  | -                                  | 41.67          | -                                 |
| <i>t</i> <i>l</i> points                             | 50                                                | 32                                               | -                                  | -                                  | 160            | -                                 |
| Recycle Delay (s)                                    | 2 – 5 <sup>b</sup>                                | 2                                                | 2 – 5 <sup>b</sup>                 | 2 – 5 <sup>b</sup>                 | 2              | 2                                 |
| ω <sub>R</sub> (kHz)                                 | 8                                                 | 12                                               | 12                                 | 22                                 | 24             | 20                                |
| o.d. rotor (mm)                                      | 4                                                 | 4                                                | 4                                  | 3.2                                | 3.2            | 3.2                               |
| Ramp CP                                              |                                                   |                                                  |                                    |                                    |                |                                   |
| Contact time (ms)                                    | 3.5                                               | 3                                                | -                                  | -                                  | -              | -                                 |
| <sup>1</sup> H Channel RF field (kHz)                | 77                                                | 43                                               | -                                  | -                                  | -              | -                                 |
| X Channel RF field (kHz)                             | 69                                                | 31                                               | -                                  | -                                  | -              | -                                 |
| <sup>1</sup> H π/2 & π pulse (us)                    | 3.25                                              | 6.5                                              | 3.35 & 6.7                         | 3.2 & 6.4                          | 3.0 & 6.6      | 3.05 & 6.1                        |
| <sup>15</sup> N π pulse (us)                         | -                                                 | -                                                | -                                  | -                                  | -              | 13                                |
| <sup>27</sup> Al RF field for saturation pulse / kHz | -                                                 | -                                                | 98                                 | 92                                 | -              | -                                 |
| Recoupling pulse                                     | -                                                 | -                                                | -                                  | SR4                                | POST-C7        | SR4                               |
| Recoupling time (ms)                                 | -                                                 | -                                                | 1.83                               | 0.18 – 2.3                         | 0.083          | 0.2 – 4.2                         |

<sup>a</sup> Same CP acquisition parameters are used for the first <sup>1</sup>H-X CP and second X-<sup>1</sup>H CP.

<sup>b</sup> Recycle delay 2 s for dehydrated H-MOR and 5 s for H-MOR after CD<sub>3</sub>CN adsorption decided by <sup>1</sup>H T<sub>1</sub>.

<sup>c</sup> The scan number was dependent on the sensitivity of corresponding <sup>1</sup>H MAS NMR spectra with different dephasing (mixing) times.
